# Supplementary material for: Crowdsourced Air Traffic Data from the OpenSky Network 2019–20
Source: Copernicus journal article supplement (doi:10.5194/essd-2020-223), 2020-08-18
Supplement: Supplementary file [file essd-2020-223-RC2-supplement.pdf]

Data cleanly available as monthly compressed files from Zenodo. Very useful metadata and guidance on Zenodo landing page.

Decoding step particularly useful!

Very good description, no comments from this reviewer. A few rare typos, probably corrected during proof-reading.

Biggest concern = file size. Unpacking the .gz file results in large (0.5 GB) .csv files, large for some spreadsheet software on some computers. This reviewer never succeeded to load May 2019 data into a Google spreadsheet, not from computer file system nor from Google drive, despite working on a reasonably fast home network. Evidently Google spreadsheets operate with a file size limits of 40 MB and 400k cells. For older versions of Microsoft Excel on older Windows PC operating systems, similar limits will apply? Many users will confront these barriers? Once opened into Mac Numbers (similar to Excel), files produce a clean useful well-documented output albeit with absurd precision of many numbers in many cells. Author and editors need to fix the file size problem for purposes of this document and for future users. Not a good situation if a reviewer can not use usual tools to access data.

Once they resolve the file size barriers, this should represent a nice product. When published, ESSD should join with authors to make public announcement?
